# Supplementary material for: Biochar-biofertilizer combinations enhance growth and nutrient uptake in silver maple grown in an urban soil
Source: PubMed Central journal article supplement (PMC10353828; doi:10.1371/journal.pone.0288291), 2023-07-18
Supplement: pone.0288291.s001.pdf [file pone.0288291.s001.pdf]

## Supplemental Tables and Figures for

Sifton MA, Smith SM, Thomas SC. 2023. Biochar-biofertilizer combinations enhance growth and nutrient uptake in silver maple grown in an urban soil. PLOS ONE. Accepted for publication June 27, 2023.

### File Contents:

S1. Total final soil carbon

S2. Mean leaf chlorophyll content index at weeks a) 4, b) 10, c) 12; and d) leaf chlorophyll fluorescence at week 12

S3. Sapling gas exchange responses a) WUE, b) photosynthesis, c) stomatal conductance

S4. Final sapling leaf macronutrient concentration of a) nitrogen, b) phosphorus, c) potassium, d) magnesium, e) calcium.

S5. Final sapling leaf micronutrient concentration of a) copper, b) aluminum, c) manganese, d) molybdenum, e) sodium, f) zinc

S6. Final sapling leaf micronutrient concentration of a) iron, b) boron, c) sulphur

Table S1: A 1-way ANOVA table for vegetation and soil responses to biochar and biofertilizers treatments

Table S2: Mean sapling leaf physiological responses to biochar and biofertilizer treatments

Table S3: 2-way ANOVA results of treatment effects on sapling gas exchange

Table S4: Mean leaf chlorophyll content and chlorophyll fluorescence

Table S5: A 1-way ANOVA table of final sapling leaf nutrient content and concentration

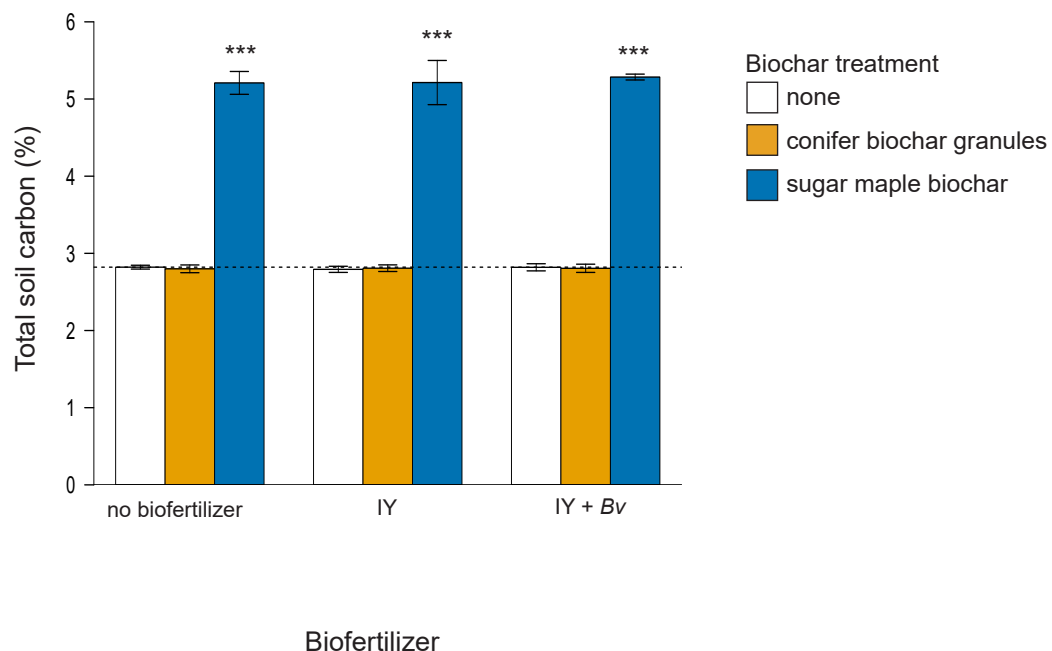

S1. Total soil carbon at the end of the 3-month experiment conducted from May-Aug, 2018 at the University of Toronto greenhouse. Statistically significant differences between control and treatment groups are indicated by asterisks (1-Way ANOVA, Dunnett's test, \*\*\* =  $p < 0.001$ ). Dashed line indicates control mean.  $N = 13$  trees for all treatments. Higher soil carbon in treatments with pure sugar maple biochar and lower carbon in granulated biochar treatments is as expected since a portion of the granulated char is comprised of a binder. IY = inactivated yeast, Bv = *Bacillus velezensis*.

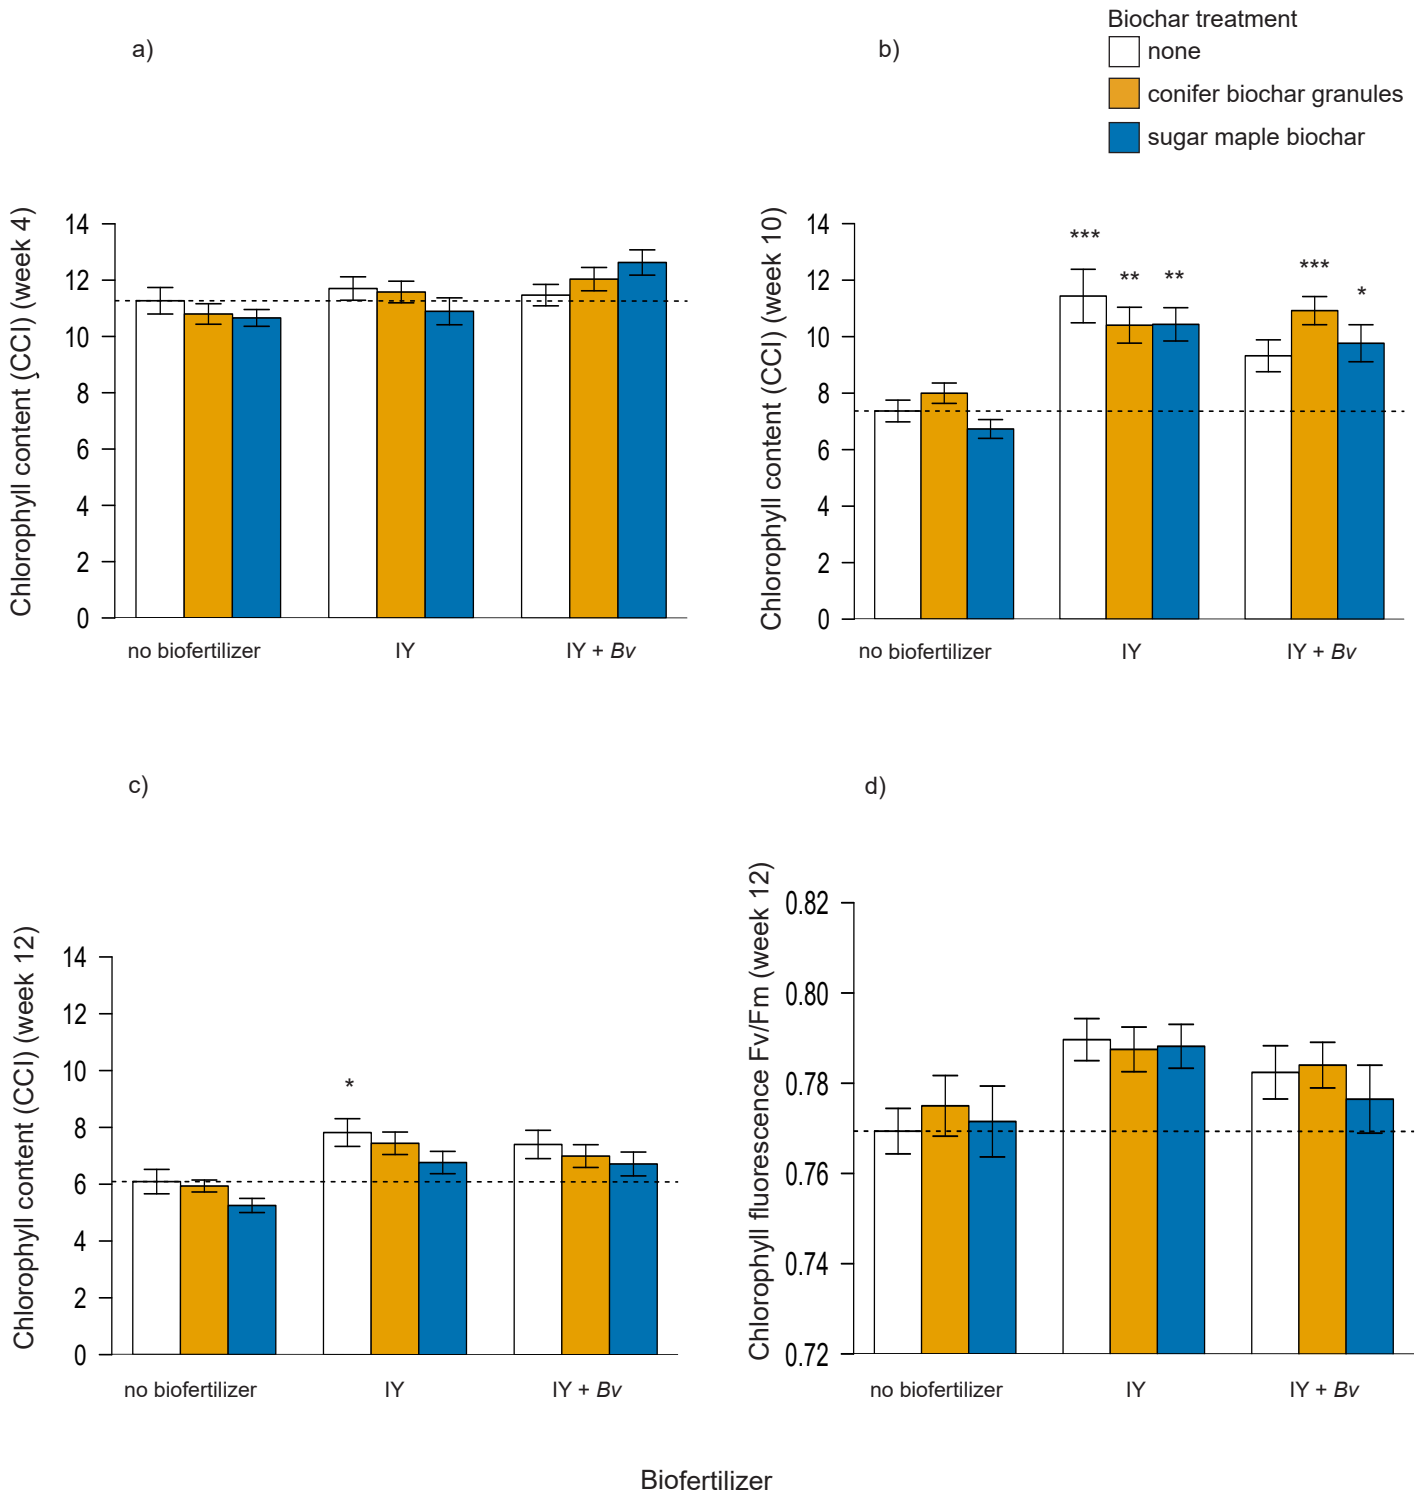

S2. Mean leaf chlorophyll content index, CCI, at: a) week 4, b) week 10, and c) week 12; leaf chlorophyll fluorescence (Fv/Fm) in week 12. Statistically significant differences between the control and the treatment groups are indicated by asterisk (1-way ANOVA, Dunnett's test, \* =  $p < 0.05$ , \*\* =  $p < 0.01$ , \*\*\* =  $p < 0.001$ ).

Dashed line indicates control mean. CCI measurements were affected in the final 3 weeks of the experiment by an outbreak of spider mites, which feed on leaf sap and reduce chlorophyll content and leaf function. Leaf chlorophyll fluorescence, quantified as Fv/Fm, was also measured in weeks 10 and 12 but no significant effects were observed. IY = inactivated yeast, Bv = *Bacillus velezensis*.

Biochar treatments:  = none,  = conifer biochar granules,  = sugar maple biochar.

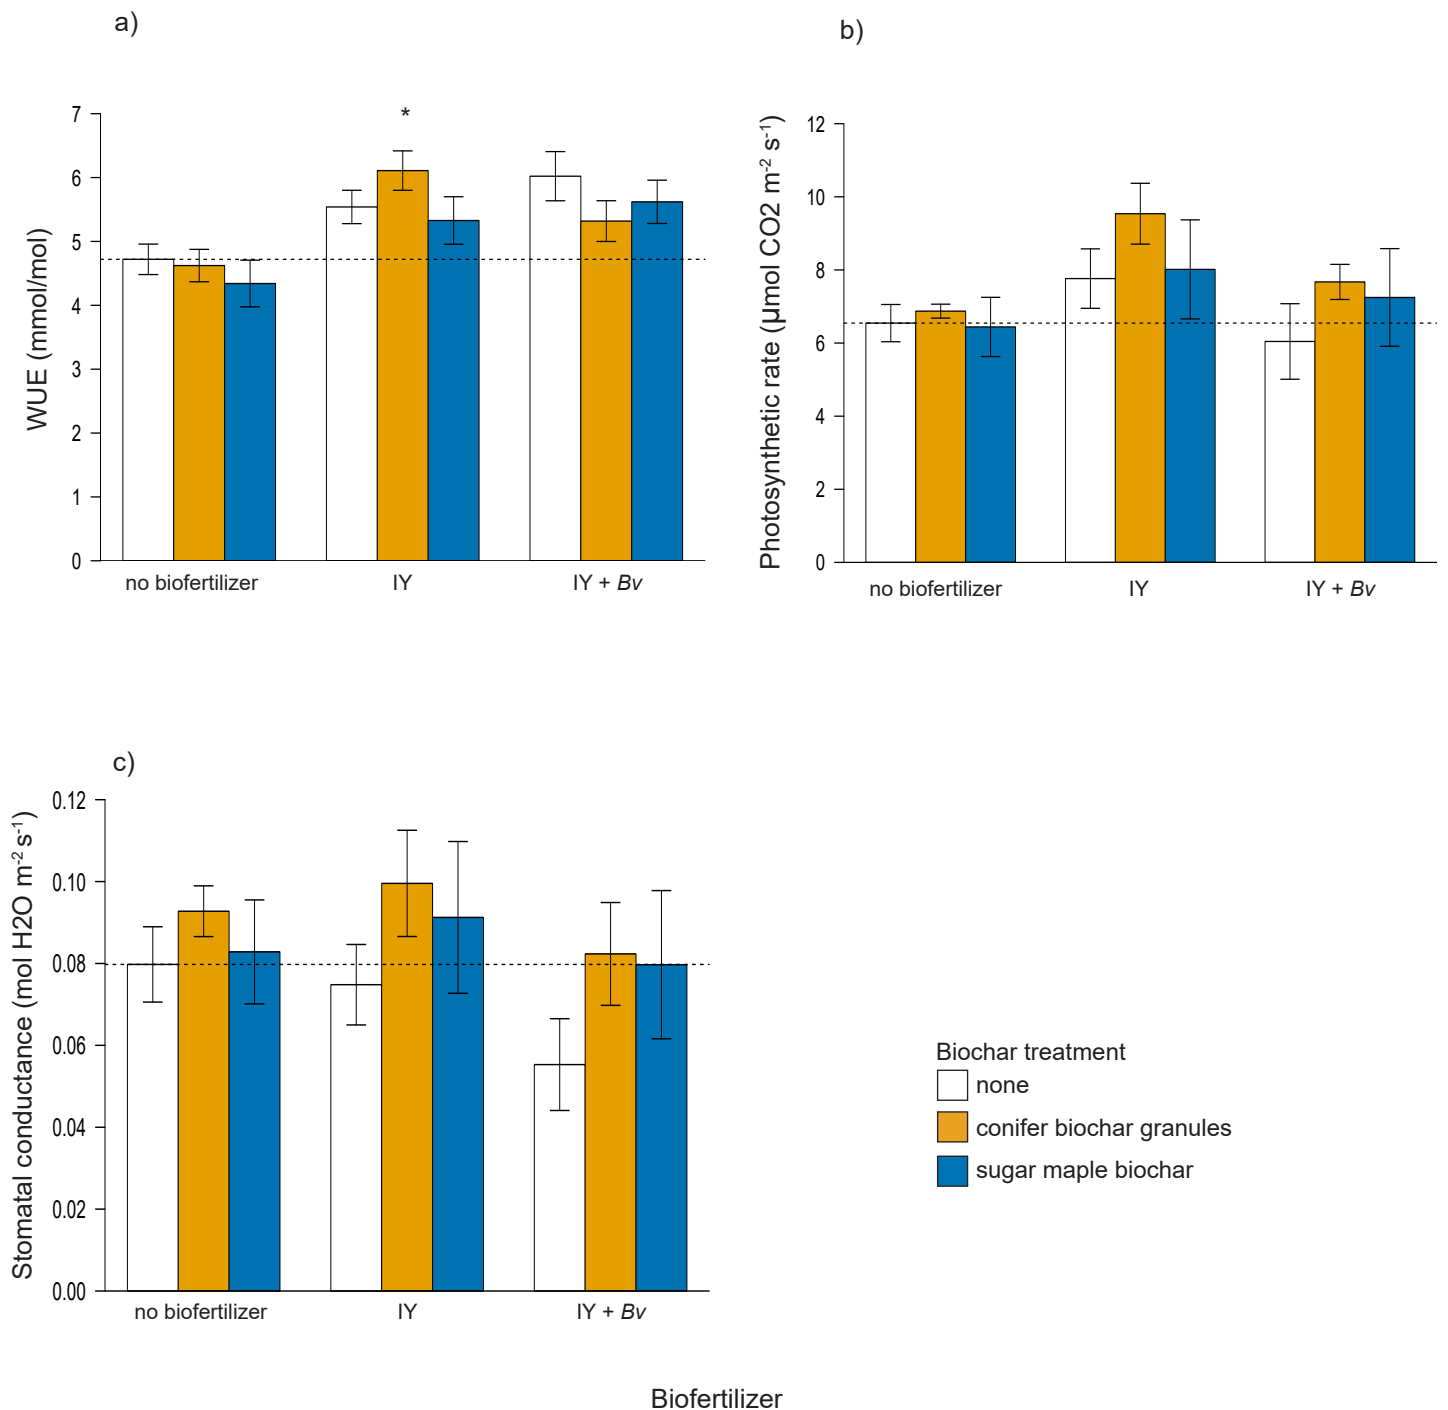

S3. Tree gas exchange responses a) Water Use Efficiency (WUE), b)  $A_{\text{sat}}$  photosynthetic rate ( $\mu\text{mol CO}_2 \text{ m}^{-2} \text{ s}^{-1}$ ), c)  $g_s$  stomatal conductance ( $\text{mol H}_2\text{O m}^{-2} \text{ s}^{-1}$ ) at the end of the experiment. Dashed line indicates control mean. Statistically significant differences between the control and the treatment groups are indicated by and asterisk (1-way ANOVA, Dunnett's test,  $* = p < 0.05$ ). 2-way ANOVA indicated that both biochar and clover biofertilizer were significant factors in WUE ( $p < 0.05$ ). See supplementary tables 3 & 4 for further details. A spider mite outbreak in the final weeks of the experiment affected final results through reduction of leaf chlorophyll. IY = inactivated yeast, Bv = *Bacillus velezensis*.

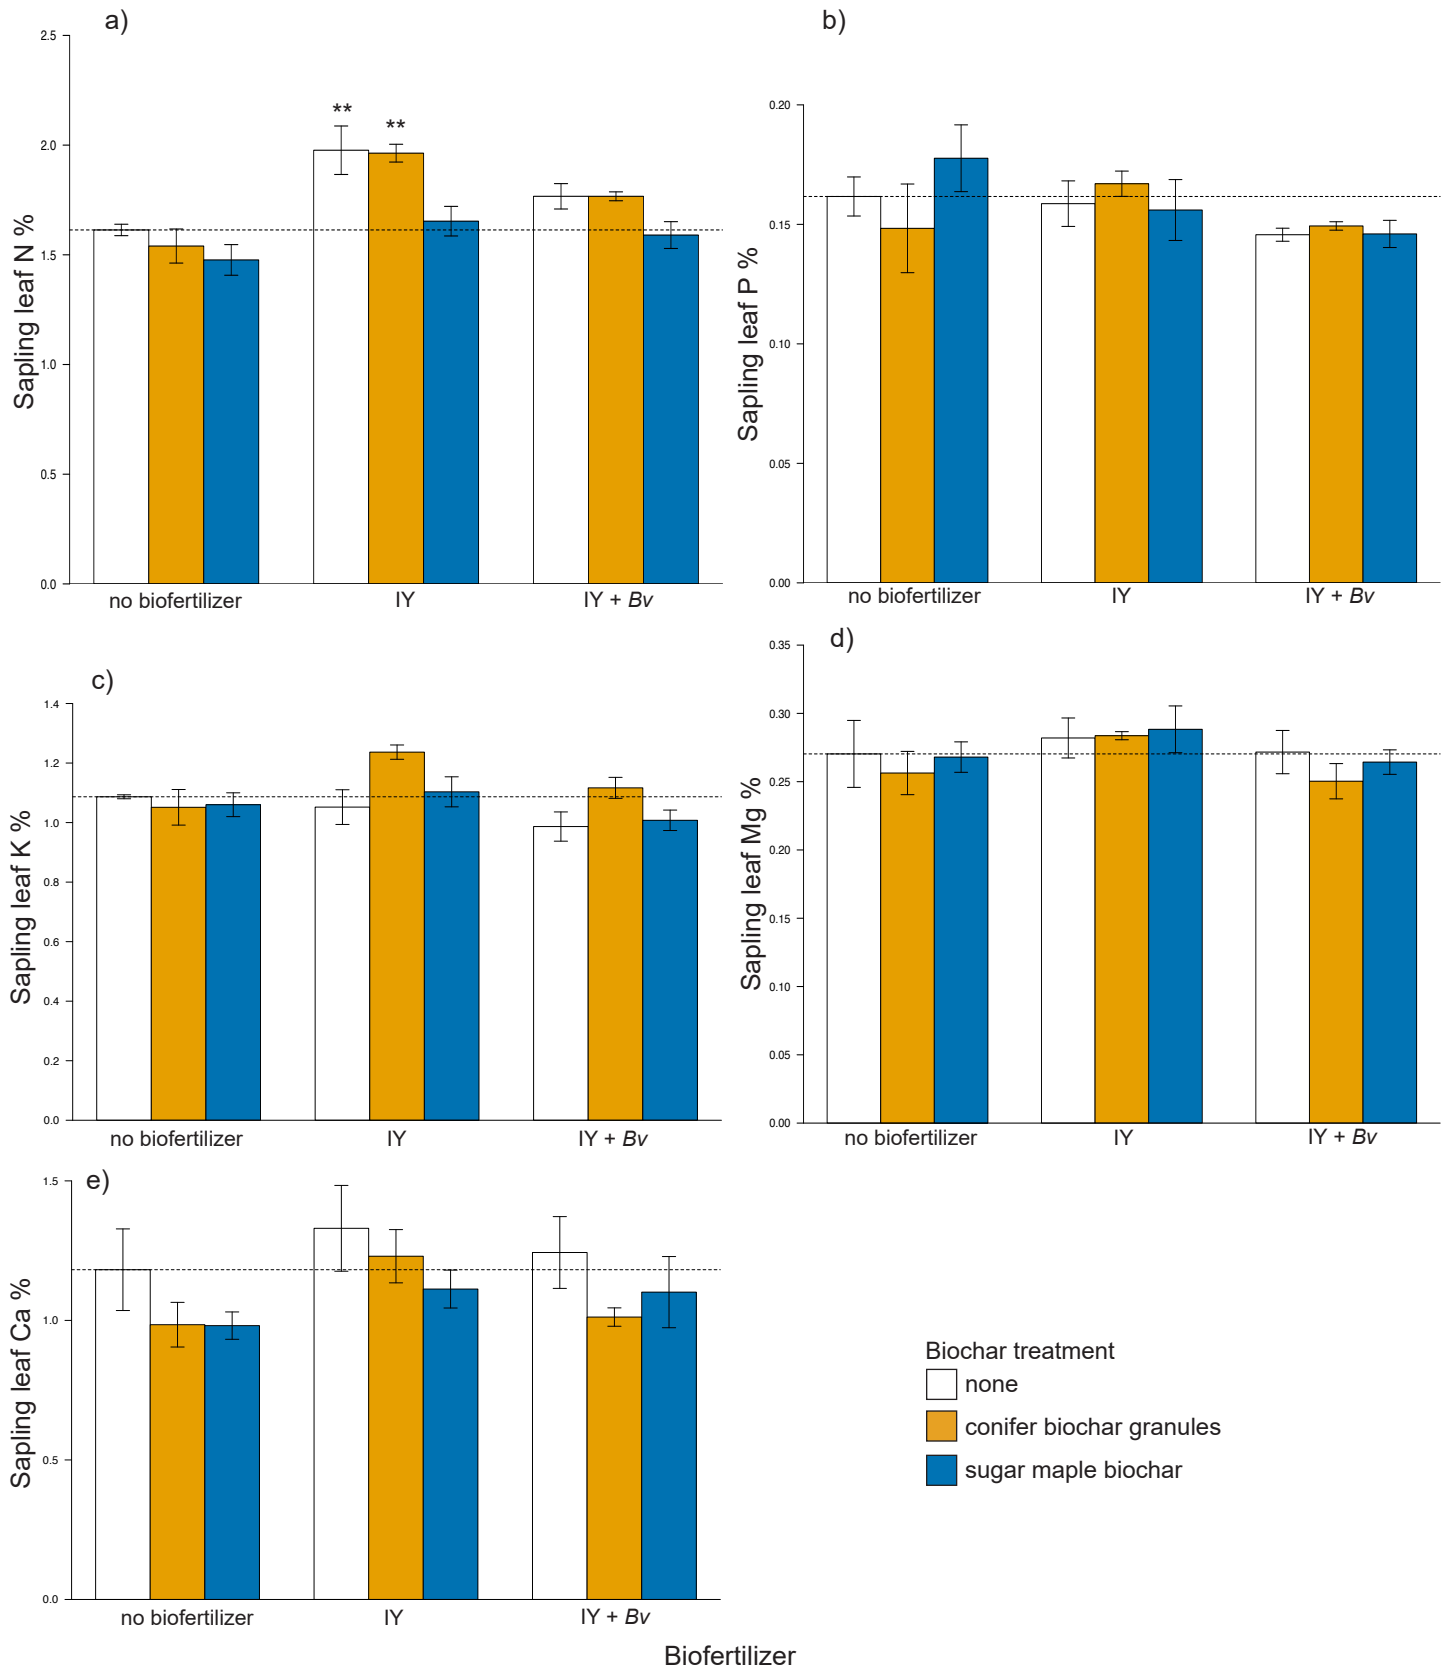

S4. Final sapling leaf macronutrient concentration (%) of: a) nitrogen, b) phosphorus, c) potassium, d) magnesium, e) calcium. Leaf sample tissues were dried at 60°C, ground, and subset into 3 reps each containing the same amount of materials from 4 replicates so that  $n = 3$  for all results. Statistically significant differences between the control and the treatment groups are indicated by and asterisk (1-way ANOVA, Dunnett's test, \*\* =  $p < 0.01$ ) Dashed line indicates control mean.

IY = inactivated yeast, Bv = *Bacillus velezensis*.

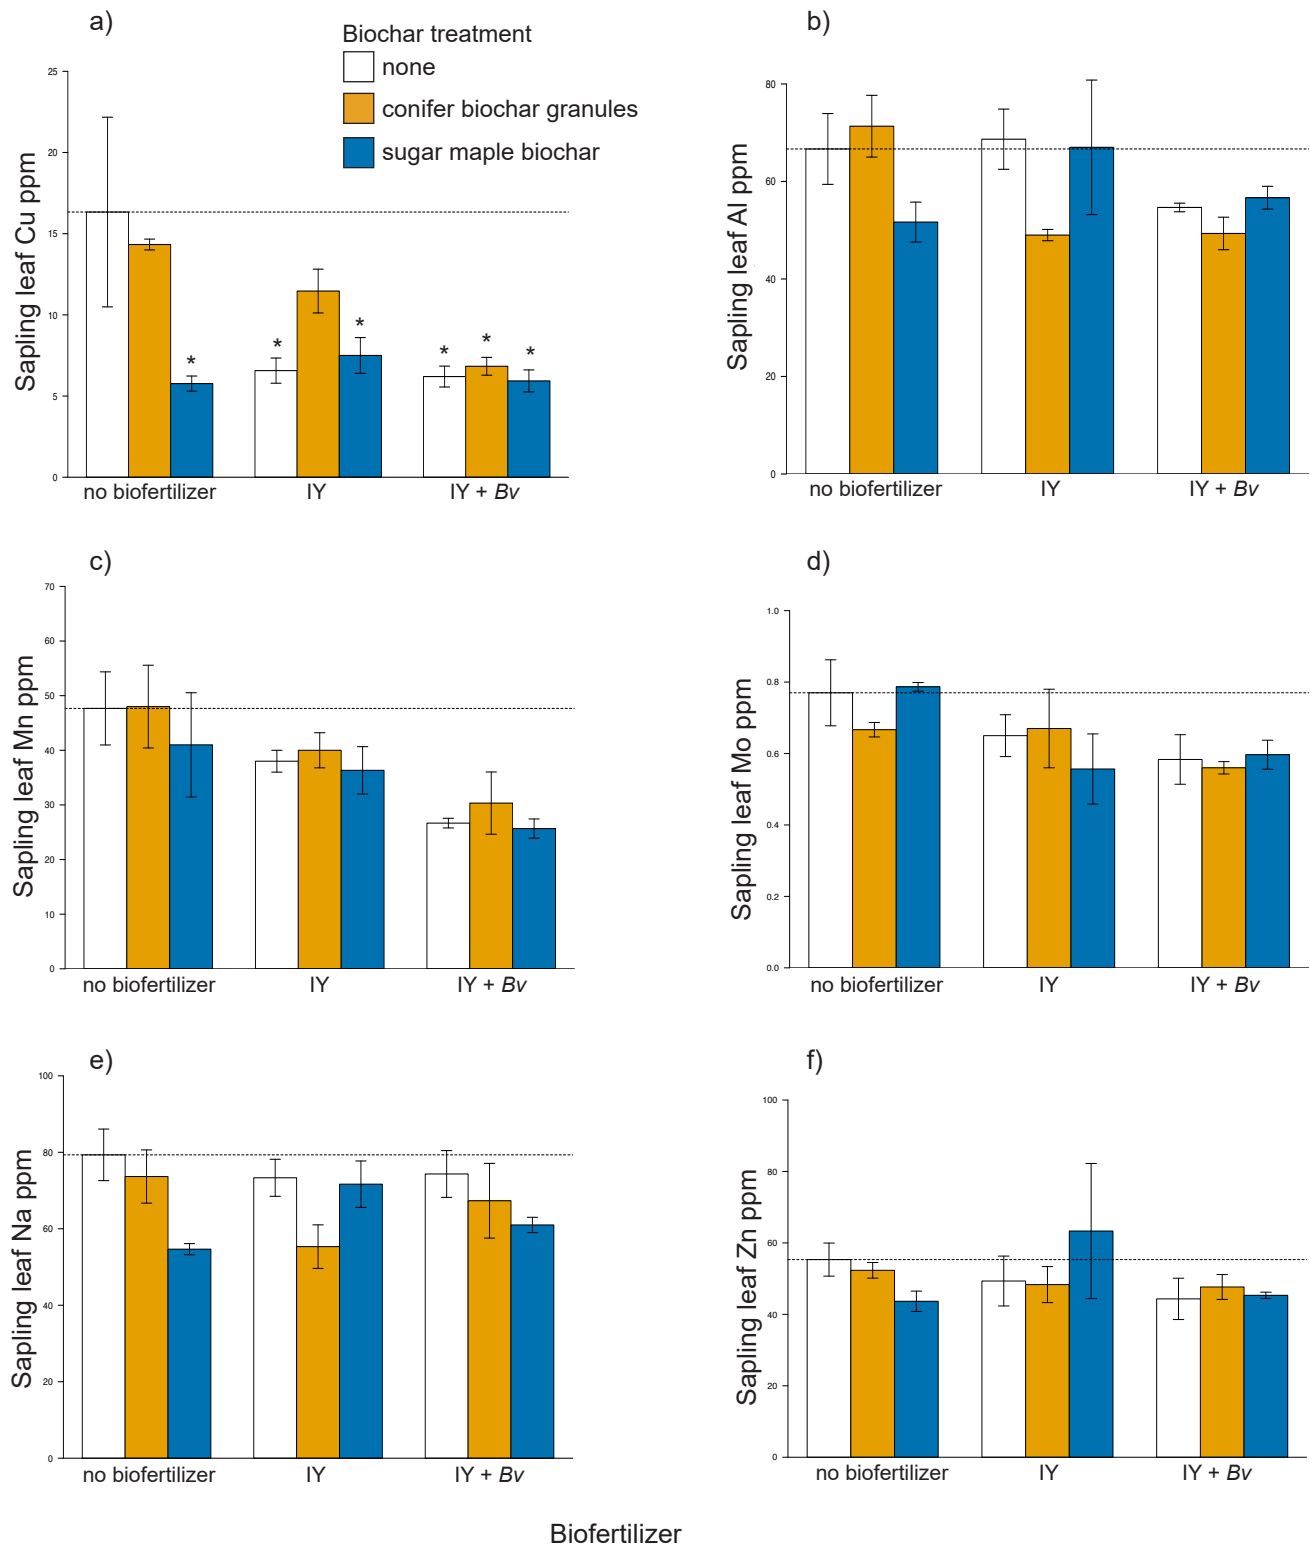

Biofertilizer

S5. Final sapling leaf micronutrient concentration (%) of: a) copper b) aluminum, c) manganese, d) molybdenum, e) sodium, f) zinc. Leaf sample tissues were dried at 60°C, ground, and subset into 3 reps each containing the same amount of materials from 4 replicates so that  $n = 3$  for all results. Results from microwave acid digestion with ICP-OES (Agilent 5110 at AFL Labs, Guelph, ON, Canada). Statistically significant differences between the control and the treatment groups are indicated by asterisk (1-way ANOVA, Dunnett's test,  $* = p < 0.05$ ) Dashed line indicates control mean. See Tables S5 and S6 1-way ANOVA results & values. IY = inactivated yeast, Bv = *Bacillus velezensis*.

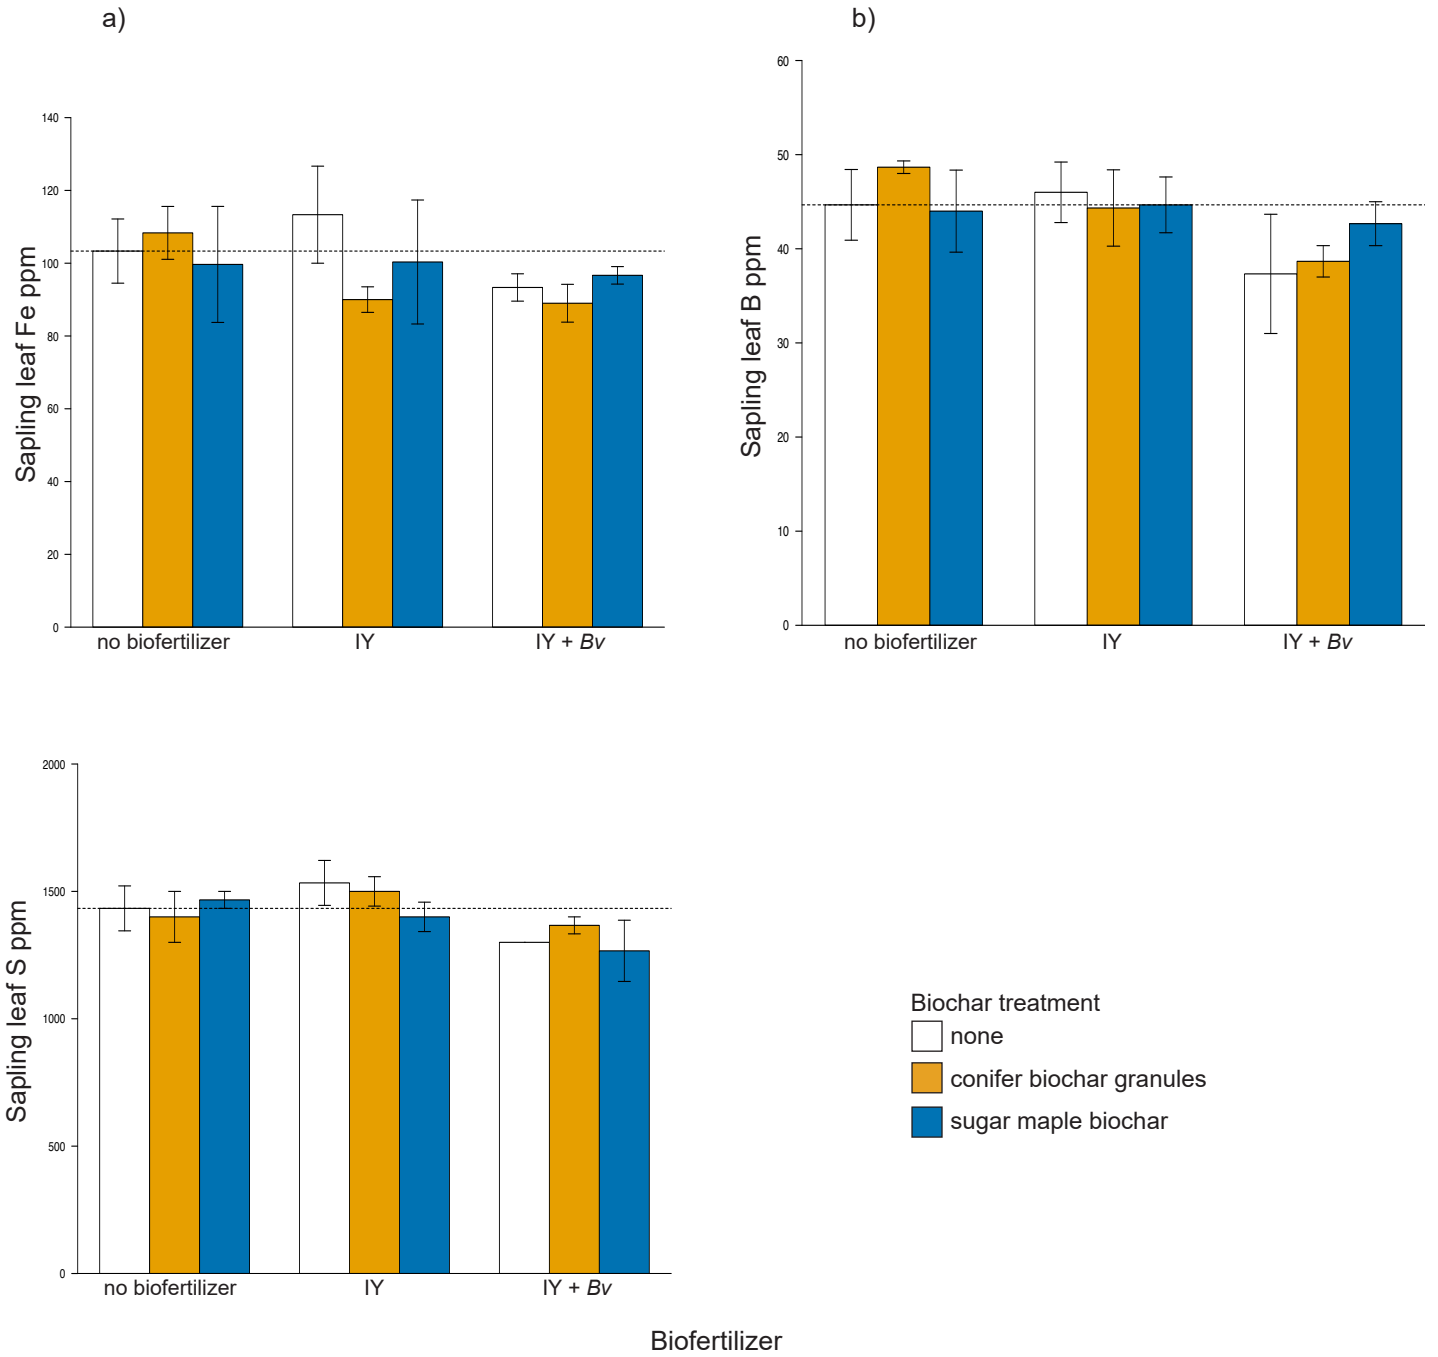

S6. Final sapling leaf micronutrient concentration (%) of: a) iron, b) boron, c) sulphur. Leaf sample tissues were dried at 60°C, ground, and subset into 3 reps each containing the same amount of materials from 4 replicates so that n = 3 for all results. Results from microwave acid digestion with ICP-OES (Agilent 5110 at AFL Labs, Guelph, ON, Canada). Treatments are not significantly different to the control at p < 0.05 according to Dunnett's post-hoc test. Dashed line indicates control mean. See Tables S5 and S7 for 1-way ANOVA results and values. IY = inactivated yeast, *Bv* = *Bacillus velezensis*.

**Table S1. 1-way ANOVA table for vegetation and soil responses to biochar and biofertilizers.**

| Factor/effect                 | Effects                                  | F-value<br>(DF <sub>between</sub> , DF <sub>within</sub> ) | p-value        |
|-------------------------------|------------------------------------------|------------------------------------------------------------|----------------|
| Sapling response              | Total dry mass                           | 6.918 (8, 108)                                             | < <b>0.001</b> |
|                               | Leaf area                                | 11.820 (8, 108)                                            | < <b>0.001</b> |
|                               | Height                                   | 6.088 (8, 108)                                             | < <b>0.001</b> |
|                               | Caliper                                  | 1.689 (8, 108)                                             | 0.109          |
|                               | Root fraction of biomass                 | 1.345 (8, 108)                                             | 0.229          |
|                               | Height:Caliper                           | 5.093 (8, 108)                                             | < <b>0.001</b> |
|                               | Leaf area ratio                          | 0.686 (8, 108)                                             | 0.703          |
|                               | Leaf mass: leaf areas                    | 1.509 (8, 108)                                             | 0.162          |
|                               | Nitrogen mass in leaf tissues            | 15.09 (8, 108)                                             | < <b>0.001</b> |
|                               | Chlorophyll content in leaf tissues      | 4.303 (8, 108)                                             | < <b>0.001</b> |
|                               | Chlorophyll fluorescence in leaf tissues | 1.621 (8, 108)                                             | 0.127          |
| Soil response                 | pH                                       | 17.590 (8, 106)                                            | < <b>0.001</b> |
|                               | EC                                       | 7.104 (8, 107)                                             | < <b>0.001</b> |
|                               | Moisture                                 | 3.249 (8, 108)                                             | <b>0.002</b>   |
|                               | Total nitrogen                           | 5.402 (8, 18)                                              | <b>0.001</b>   |
|                               | Total carbon                             | 113.500 (8, 18)                                            | < <b>0.001</b> |
| Sapling gas exchange response | Leaf water use efficiency (WUE)          | 3.765 (8, 47)                                              | <b>0.002</b>   |
|                               | Photosynthetic rate ( $A_{sat}$ )        | 1.664 (8, 47)                                              | 0.133          |
|                               | Stomatal conductance ( $g_s$ )           | 0.893 (8, 36)                                              | 0.530          |

Significant results ( $p < 0.05$ ) are bold.

**Table S2. Mean (S.E.) physiological responses to biochar and biofertilizer treatments measured in sapling leaves.**

| Treatment                                 | N | WUE % (mmol/mol)     | A <sub>sat</sub> ( μmol CO <sub>2</sub> m <sup>-2</sup> s <sup>-1</sup> ) | g <sub>s</sub> (mmol H <sub>2</sub> O m <sup>-2</sup> s <sup>-1</sup> ) |
|-------------------------------------------|---|----------------------|---------------------------------------------------------------------------|-------------------------------------------------------------------------|
| control                                   | 6 | 4.720 (0.238)        | 6.546 (0.509)                                                             | 0.080 (0.009)                                                           |
| conifer biochar granules                  | 5 | 4.622 (0.254)        | 6.873 (0.191)                                                             | 0.093 (0.006)                                                           |
| conifer biochar granules + IY             | 7 | <b>6.109</b> (0.309) | 9.538 (0.832)                                                             | 0.100 (0.013)                                                           |
| conifer biochar granules + IY + <i>Bv</i> | 8 | 5.318 (0.319)        | 7.672 (0.480)                                                             | 0.082 (0.013)                                                           |
| IY                                        | 8 | 5.540 (0.261)        | 7.763 (0.814)                                                             | 0.075 (0.010)                                                           |
| sugar maple biochar                       | 8 | 4.341 (0.365)        | 6.441 (0.810)                                                             | 0.083 (0.013)                                                           |
| sugar maple biochar + IY                  | 4 | 5.328 (0.372)        | 8.015 (1.355)                                                             | 0.091 (0.019)                                                           |
| sugar maple biochar + IY + <i>Bv</i>      | 5 | 5.620 (0.339)        | 7.247 (1.336)                                                             | 0.080 (0.018)                                                           |
| IY + <i>Bv</i>                            | 5 | 6.021 (0.385)        | 6.044 (1.033)                                                             | 0.055 (0.011)                                                           |

Abbreviations: N, number of replicates; A<sub>sat</sub>, photosynthetic rate; g<sub>s</sub>, stomatal conductance; WUE, water use efficiency calculated as A<sub>sat</sub>/mean transpiration rate. Significant values compared to the control according to Dunnett's test are in bold, p < 0.05. IY = inactivated yeast, *Bv* = *Bacillus velezensis*.

**Table S3. 2-way ANOVA results of treatment effects on sapling gas exchange.**

|                                            | Deg. Freedom | Sum of Squares | Mean Square | F Statistic | p-value          |
|--------------------------------------------|--------------|----------------|-------------|-------------|------------------|
| <b>WUE</b>                                 |              |                |             |             |                  |
| Biochar                                    | 2            | 0.783          | 0.391       | 0.596       | 0.555            |
| Biofertilizer                              | 2            | 15.793         | 7.897       | 12.016      | <b>&lt;0.001</b> |
| Biochar x biofertilizer                    | 4            | 3.216          | 0.804       | 1.223       | 0.314            |
| Error                                      | 47           | 30.888         | 0.657       |             |                  |
| <b>A<sub>sat</sub> photosynthetic rate</b> |              |                |             |             |                  |
| Biochar                                    | 2            | 16.240         | 8.121       | 1.877       | 0.1643           |
| Biofertilizer                              | 2            | 35.890         | 17.946      | 4.148       | <b>0.0219</b>    |
| Biochar x biofertilizer                    | 4            | 5.460          | 1.366       | 0.316       | 0.866            |
| Error                                      | 47           | 203.340        | 4.326       |             |                  |
| <b>g<sub>s</sub> stomatal conductance</b>  |              |                |             |             |                  |
| Biochar                                    | 2            | 0.005          | 0.002       | 2.300       | 0.111            |
| Biofertilizer                              | 2            | 0.002          | <0.001      | 0.900       | 0.413            |
| Biochar x biofertilizer                    | 4            | <0.001         | <0.001      | 0.186       | 0.945            |
| Error                                      | 47           | 0.047          | <0.001      |             |                  |

Significant results (p < 0.05) are in bold.



**Table S4. Mean (S.E.) leaf chlorophyll content and chlorophyll fluorescence measured in sapling leaves.**

| Treatment                             | CCI<br>Week 4    | CCI<br>Week 10             | CCI<br>Week 12          | Fv/Fm<br>Week 10 | Fv/Fm<br>Week 12 |
|---------------------------------------|------------------|----------------------------|-------------------------|------------------|------------------|
| control                               | 11.269<br>(.471) | 7.369<br>(.385)            | 6.092<br>(.430)         | 0.763<br>(.008)  | 0.769<br>(.005)  |
| conifer biochar granules              | 10.800<br>(.363) | 8.000<br>(.361)            | 5.938<br>(.211)         | 0.781<br>(.005)  | 0.775<br>(.007)  |
| conifer biochar granules<br>+ IY      | 11.585<br>(.384) | <b>10.412**</b><br>(.635)  | 7.446<br>(.396)         | 0.771<br>(.009)  | 0.788<br>(.005)  |
| conifer biochar granules<br>+ IY + Bv | 12.046<br>(.415) | <b>10.931***</b><br>(.499) | 7.000<br>(.401)         | 0.767<br>(.006)  | 0.784<br>(.005)  |
| IY                                    | 11.708<br>(.416) | <b>11.442***</b><br>(.947) | <b>7.823*</b><br>(.488) | 0.769<br>(.010)  | 0.790<br>(.005)  |
| sugar maple biochar                   | 10.662<br>(.298) | 6.735<br>(.333)            | 5.254<br>(.249)         | 0.765<br>(.009)  | 0.772<br>(.008)  |
| sugar maple biochar<br>+ IY           | 10.900<br>(.478) | <b>10.442**</b><br>(.589)  | 6.769<br>(.393)         | 0.762<br>(.010)  | 0.788<br>(.005)  |
| sugar maple biochar<br>+ IY + Bv      | 12.639<br>(.449) | <b>9.777*</b><br>(.655)    | 6.723<br>(.420)         | 0.776<br>(.011)  | 0.777<br>(.008)  |
| IY + Bv                               | 11.477<br>(.381) | 9.331<br>(.565)            | 7.408<br>(.498)         | 0.766<br>(.006)  | 0.782<br>(.006)  |

N=13 trees for all treatments. Results of Dunnett's test for statistical significance compared to control are indicated in bold by \* =  $p < 0.05$ , \*\* =  $p < 0.01$ , \*\*\* =  $p < 0.001$ . Abbreviations: CCI, chlorophyll content index; (Fv/Fm), chlorophyll fluorescence. Using 1-way ANOVA, CCI in week 4 was significant ( $p = 0.020$ ), but no significant differences were observed compared to the control. CCI in week 10 was highly significant ( $F: 8.143$ , on 8 and 108 DF,  $p < 0.001$ ) with IY alone and all combinations of inoculants with biochars significantly higher than control. A spider mite outbreak in the final 3 weeks of the experiment reduced chlorophyll content in sapling leaves and affected results as chlorophyll content values were reduced across all treatments by the mites. Thus, CCI in week 12 was highly significant overall according to 1-way ANOVA ( $F: 4.303$  on 8 and 108 DF,  $p < 0.001$ ), but only the IY treatment remained significantly higher than the control. Chlorophyll fluorescence in weeks 10 and 12 was not significant according to 1-way ANOVA analysis, though final week 12 2-way ANOVA results showed that inoculants were a significant influence on results (see Table 2). IY = inactivated yeast, Bv = *Bacillus velezensis*.

**Table S5. A 1-way ANOVA table of final sapling leaf nutrient content and concentration responses.**

| Leaf nutrient | Content                                                 |                | Concentration                                           |                |
|---------------|---------------------------------------------------------|----------------|---------------------------------------------------------|----------------|
|               | F-value (DF <sub>between</sub> , DF <sub>within</sub> ) | p-value        | F-value (DF <sub>between</sub> , DF <sub>within</sub> ) | p-value        |
| N             | 14.34 (8, 99)                                           | < <b>0.001</b> | 7.559 (8, 18)                                           | < <b>0.001</b> |
| P             | 10.63 (8, 99)                                           | < <b>0.001</b> | 1.131 (8, 18)                                           | 0.3895         |
| K             | 10.33 (8, 99)                                           | < <b>0.001</b> | 2.877 (8, 18)                                           | <b>0.0298</b>  |
| Mg            | 12.47 (8, 99)                                           | < <b>0.001</b> | 0.722 (8, 18)                                           | 0.6709         |
| Ca            | 10.72 (8, 99)                                           | < <b>0.001</b> | 1.373 (8, 18)                                           | 0.2728         |
| Cu            | 11.28 (8, 99)                                           | < <b>0.001</b> | 3.694 (8, 18)                                           | <b>0.0101</b>  |
| Al            | 12.09 (8, 99)                                           | < <b>0.001</b> | 2.012 (8, 18)                                           | 0.1040         |
| B             | 8.756 (8, 99)                                           | < <b>0.001</b> | 0.945 (8, 18)                                           | 0.5055         |
| Fe            | 9.566 (8, 99)                                           | < <b>0.001</b> | 0.655 (8, 18)                                           | 0.7228         |
| Mn            | 3.281 (8, 99)                                           | <b>0.002</b>   | 2.317 (8, 18)                                           | 0.0661         |
| Mo            | 5.089 (8, 99)                                           | < <b>0.001</b> | 1.586 (8, 18)                                           | 0.1977         |
| Na            | 8.000 (8, 99)                                           | < <b>0.001</b> | 2.177 (8, 18)                                           | 0.0813         |
| S             | 9.417 (8, 99)                                           | < <b>0.001</b> | 1.420 (8, 18)                                           | 0.2541         |
| Zn            | 11.83 (8, 99)                                           | < <b>0.001</b> | 0.690 (8, 18)                                           | 0.6954         |

Significant results ( $p < 0.05$ ) are in bold.

NOTE: See Supplemental Tables S6, S7 in separate PDF document due to landscape orientation named “Sifton et al. 2023 Biochar biofert. urb. forest. Supp. File2”
