# Supplementary material for: Biochar-biofertilizer combinations enhance growth and nutrient uptake in silver maple grown in an urban soil
Source: PubMed Central journal article supplement (PMC10353828; doi:10.1371/journal.pone.0288291), 2023-07-18
Supplement: pone.0288291.s002.pdf [file pone.0288291.s002.pdf]

**Table S6: Final content of sapling leaf nutrients & Table S7: Final concentration of sapling leaf nutrients****Table S6. Content (mass in mg) of sapling leaf nutrients at the end of the experiment.**

| Leaf nutrient | Treatment     |                          |                         |                         |                               |                          |                      |                                           |                                      |
|---------------|---------------|--------------------------|-------------------------|-------------------------|-------------------------------|--------------------------|----------------------|-------------------------------------------|--------------------------------------|
|               | 1             | 2                        | 3                       | 4                       | 5                             | 6                        | 7                    | 8                                         | 9                                    |
|               | control       | conifer biochar granules | sugar maple biochar     | IY                      | conifer biochar granules + IY | sugar maple biochar + IY | IY + <i>Bv</i>       | conifer biochar granules + IY + <i>Bv</i> | sugar maple biochar + IY + <i>Bv</i> |
| N             | 87.83 (6.85)  | 98.12 (4.66)             | 112.06 (6.15)           | <b>170.53(12.21)</b>    | <b>173.99(10.40)</b>          | <b>178.53(15.01)</b>     | <b>141.85 (8.79)</b> | <b>174.50(11.61)</b>                      | <b>176.48 (8.00)</b>                 |
| P             | 8.76 (0.65)   | <b>9.38 (0.56)</b>       | <b>13.41 (0.66)</b>     | <b>13.67 (0.97)</b>     | <b>14.78 (0.86)</b>           | <b>16.75 (1.42)</b>      | 11.66 (0.64)         | <b>14.73 (0.94)</b>                       | <b>16.22 (0.76)</b>                  |
| K             | 59.29 (4.89)  | 67.00 (3.26)             | 80.31 (3.96)            | <b>93.84 (9.12)</b>     | <b>109.65 (6.45)</b>          | <b>119.94(10.92)</b>     | 79.46 (5.37)         | <b>110.59 (7.99)</b>                      | <b>111.93 (5.22)</b>                 |
| Mg            | 14.62 (1.16)  | 16.32 (0.78)             | 20.43 (1.26)            | <b>24.34 (1.74)</b>     | <b>25.18 (1.57)</b>           | <b>31.08 (2.62)</b>      | <b>21.80 (1.40)</b>  | <b>24.57 (1.41)</b>                       | <b>29.31 (1.24)</b>                  |
| Ca            | 63.59 (5.00)  | 62.78 (3.41)             | 74.97 (4.90)            | <b>113.45 (8.43)</b>    | <b>108.69 (6.82)</b>          | <b>120.78(11.23)</b>     | <b>100.07 (7.76)</b> | <b>99.33 (5.54)</b>                       | <b>122.35 (8.12)</b>                 |
| Cu            | 0.085 (0.012) | 0.092 (0.005)            | <b>0.044 (0.002)</b>    | <b>0.055 (0.003)</b>    | 0.100 (0.006)                 | 0.080 (0.008)            | <b>0.049 (0.003)</b> | 0.067 (0.003)                             | 0.066 (0.005)                        |
| Al            | 0.361 (0.030) | 0.453 (0.023)            | 0.391 (0.021)           | <b>0.586 (0.038)</b>    | 0.434 (0.024)                 | <b>0.689 (0.057)</b>     | 0.438 (0.024)        | 0.484 (0.029)                             | <b>0.629 (0.030)</b>                 |
| B             | 0.243 (0.020) | 0.312 (0.016)            | 0.337 (0.026)           | <b>0.395 (0.027)</b>    | <b>0.389 (0.021)</b>          | <b>0.482 (0.042)</b>     | 0.304 (0.031)        | <b>0.380 (0.023)</b>                      | <b>0.475 (0.025)</b>                 |
| Fe            | 0.559 (0.044) | 0.689 (0.033)            | 0.747 (0.050)           | <b>0.958 (0.059)</b>    | <b>0.795 (0.044)</b>          | <b>1.064 (0.106)</b>     | 0.745 (0.040)        | <b>0.870 (0.045)</b>                      | <b>1.073 (0.048)</b>                 |
| Mn            | 0.254 (0.018) | 0.305 (0.023)            | 0.318 (0.040)           | 0.339 (0.033)           | 0.357 (0.029)                 | <b>0.404 (0.050)</b>     | 0.213 (0.012)        | 0.305 (0.037)                             | 0.285 (0.015)                        |
| Mo            | 0.004(<0.001) | 0.004(<0.001)            | <b>0.006(&lt;0.001)</b> | <b>0.006(&lt;0.001)</b> | <b>0.006(&lt;0.001)</b>       | <b>0.006(&lt;0.001)</b>  | 0.005(<0.001)        | 0.006(<0.001)                             | <b>0.007(&lt;0.001)</b>              |
| Na            | 0.427 (0.029) | 0.469 (0.026)            | 0.415 (0.023)           | <b>0.651 (0.063)</b>    | 0.491 (0.039)                 | <b>0.793 (0.089)</b>     | 0.594 (0.038)        | <b>0.651 (0.038)</b>                      | <b>0.675 (0.026)</b>                 |
| S             | 7.774 (0.608) | 8.904 (0.438)            | <b>11.144(0.594)</b>    | <b>13.228(0.951)</b>    | <b>13.278(0.786)</b>          | <b>15.092(1.244)</b>     | 10.422(0.600)        | <b>13.508(0.921)</b>                      | <b>14.100(0.885)</b>                 |
| Zn            | 0.298 (0.020) | 0.334 (0.016)            | 0.331 (0.018)           | 0.414 (0.025)           | <b>0.424 (0.023)</b>          | <b>0.637 (0.063)</b>     | 0.351 (0.023)        | <b>0.476 (0.042)</b>                      | <b>0.503 (0.021)</b>                 |

Leaf nutrients were calculated using mean leaf nutrient concentration values multiplied by total dry leaf mass for each replicate (n = 12 for all treatments). Results of Dunnett's test for statistical significance compared to control are indicated in bold where p < 0.05. IY = inactivated yeast, *Bv* = *Bacillus velezensis*.

**Table S7. Concentration of maple sapling leaf nutrients at the end of the experiment.**

| Leaf nutrient | Treatment     |                          |                     |                      |                               |                          |                    |                                           |                                      |
|---------------|---------------|--------------------------|---------------------|----------------------|-------------------------------|--------------------------|--------------------|-------------------------------------------|--------------------------------------|
|               | 1             | 2                        | 3                   | 4                    | 5                             | 6                        | 7                  | 8                                         | 9                                    |
|               | control       | conifer biochar granules | sugar maple biochar | IY                   | conifer biochar granules + IY | sugar maple biochar + IY | IY + <i>Bv</i>     | conifer biochar granules + IY + <i>Bv</i> | sugar maple biochar + IY + <i>Bv</i> |
| N %           | 1.613 (0.026) | 1.540 (0.078)            | 1.477 (0.070)       | <b>1.977 (0.111)</b> | <b>1.963 (0.041)</b>          | 1.653 (0.067)            | 1.767 (0.058)      | 1.767 (0.020)                             | 1.590 (0.061)                        |
| P %           | 0.162 (0.008) | 0.148 (0.019)            | 0.178 (0.014)       | 0.159 (0.010)        | 0.167 (0.005)                 | 0.156 (0.013)            | 0.146 (0.003)      | 0.149 (0.002)                             | 0.146 (0.006)                        |
| K %           | 1.087 (0.007) | 1.051 (0.060)            | 1.060 (0.040)       | 1.052 (0.058)        | 1.237 (0.024)                 | 1.103 (0.050)            | 0.987 (0.049)      | 1.117 (0.035)                             | 1.008 (0.034)                        |
| Mg %          | 0.270 (0.025) | 0.256 (0.016)            | 0.268 (0.011)       | 0.282 (0.015)        | 0.284 (0.003)                 | 0.288 (0.017)            | 0.272 (0.016)      | 0.250 (0.013)                             | 0.264 (0.009)                        |
| Ca %          | 1.182 (0.146) | 0.985 (0.080)            | 0.981 (0.049)       | 1.330 (0.154)        | 1.230 (0.095)                 | 1.112 (0.068)            | 1.243 (0.129)      | 1.012 (0.033)                             | 1.101 (0.128)                        |
| Cu ppm        | 16.33 (5.84)  | 14.33 (0.33)             | <b>5.77 (0.47)</b>  | <b>6.57 (0.78)</b>   | 11.47 (1.35)                  | <b>7.50 (1.10)</b>       | <b>6.20 (0.64)</b> | <b>6.83 (0.55)</b>                        | <b>5.93 (0.68)</b>                   |
| Al ppm        | 66.67 (7.26)  | 71.33 (6.33)             | 51.67 (4.10)        | 68.67 (6.17)         | 49.00 (1.15)                  | 67.00 (13.80)            | 54.67 (0.88)       | 49.33 (3.33)                              | 56.67 (2.33)                         |
| B ppm         | 44.67 (3.76)  | 48.67 (0.67)             | 44.00 (4.36)        | 46.00 (3.21)         | 44.33 (4.06)                  | 44.67 (2.96)             | 37.33 (6.33)       | 38.67 (1.67)                              | 42.67 (2.33)                         |
| Fe ppm        | 103.33 (8.82) | 108.33 (7.26)            | 99.67 (15.94)       | 113.33 (13.33)       | 90.00 (3.51)                  | 100.33 (17.03)           | 93.33 (3.76)       | 89.00 (5.20)                              | 96.67 (2.40)                         |
| Mn ppm        | 47.67 (6.69)  | 48.00 (7.57)             | 41.00 (9.54)        | 38.00 (2.00)         | 40.00 (3.21)                  | 36.33 (4.33)             | 26.67 (0.88)       | 30.33 (5.70)                              | 25.67 (1.76)                         |
| Mo ppm        | 0.77 (0.09)   | 0.67 (0.02)              | 0.79 (0.01)         | 0.65 (0.06)          | 0.67 (0.11)                   | 0.56 (0.10)              | 0.58 (0.07)        | 0.56 (0.02)                               | 0.60 (0.04)                          |
| Na ppm        | 79.33 (6.74)  | 73.67 (6.96)             | 54.67 (1.45)        | 73.33 (4.84)         | 55.33 (5.70)                  | 71.67 (6.06)             | 74.33 (6.12)       | 67.33 (9.77)                              | 61.00 (2.00)                         |
| S ppm         | 1433 (88)     | 1400 (100)               | 1467 (33)           | 1533 (88)            | 1500 (58)                     | 1400 (58)                | 1300 (0)           | 1367 (33)                                 | 1267 (120)                           |
| Zn ppm        | 55.33 (4.631) | 52.33 (2.186)            | 43.67 (2.848)       | 49.33 (6.984)        | 48.33 (5.044)                 | 63.33 (18.91)            | 44.33 (5.783)      | 47.67 (3.480)                             | 45.33 (0.882)                        |

Leaf nutrients were analyzed using the following methods: C: combustion elemental analysis (CN628 LECO, LECO Instruments Ltd., Mississauga, ON, Canada); N combustion and thermal conductivity detection (Elementar Vario Macro Cube, at AFL, Guelph, ON, Canada); Al, B, Ca, Cu, Fe, Mg, Mn, Mo, P, K, Na, Zn: microwave acid digestion with ICP-OES (Agilent 5110, at AFL, Guelph, ON, Canada). Values are means ( $\pm$ SE) of triplicate measurements of samples that were evenly-pooled from dried, ground leaf tissue. Results of Dunnett's test for statistical significance compared to control are indicated in bold where  $p < 0.05$ . IY = inactivated yeast, *Bv* = *Bacillus velezensis*.

NOTE: See Supplemental Tables S1-S6 & Tables S1-S5 in separate PDF document due to landscape orientation named "Sifton et al. 2023 Biochar biofert. urb. forest. Supp. File1".
